# Supplementary material for: Polylactide-Grafted Metal-Alginate Aerogels
Source: MDPI journal article supplement (doi:10.3390/polym14061254), 2022-03-21
Supplement: s1 [file s1]

Article

# Poly lactide-Grafted Metal-Alginate Aerogels

Grigorios Raptopoulos <sup>1,\*</sup>, Ioannis Choinopoulos <sup>2</sup>, Filippos Kontoes-Georgoudakis <sup>2</sup> and Patrina Paraskevopoulou <sup>1,\*</sup>

<sup>1</sup> Inorganic Chemistry Laboratory, Department of Chemistry, National and Kapodistrian University of Athens, Panepistimiopolis Zografou, 15771 Athens, Greece

<sup>2</sup> Industrial Chemistry Laboratory, Department of Chemistry, National and Kapodistrian University of Athens, Panepistimiopolis Zografou, 15771 Athens, Greece; ichoinop@chem.uoa.gr (I.C.); fkontoes@chem.uoa.gr (F.K.-G.)

\* Correspondence: grigorisrap@chem.uoa.gr (G.R.); paraskevopoulou@chem.uoa.gr (P.P.)

## Table of contents

|                                                                                                                                                                                                                                                                                   | Page |
|-----------------------------------------------------------------------------------------------------------------------------------------------------------------------------------------------------------------------------------------------------------------------------------|------|
| <b>Figure S1.</b> Size distributions of Ca-alginate and g-Ca-alginate (G41) aerogels with different LA/OH molar ratios, as indicated (diameters measured with ImageJ; histograms were calculated using OriginPro 9.0). Mean diameter and sample size (N) are shown on the Figure. | S2   |
| <b>Figure S2.</b> Size distributions of Ca-alginate and g-Ca-alginate (G56) aerogels with different LA/OH molar ratios, as indicated (diameters measured with ImageJ; histograms were calculated using OriginPro 9.0). Mean diameter and sample size (N) are shown on the Figure. | S3   |
| <b>Figure S3.</b> Size distributions of M-alginate and g-M-alginate (G41) aerogels with different LA/OH molar ratios, as indicated (diameters measured with ImageJ; histograms were calculated using OriginPro 9.0). Mean diameter and sample size (N) are shown on the Figure.   | S4   |
| <b>Figure S4.</b> Size distributions of M-alginate and g-M-alginate (G56) aerogels with different LA/OH molar ratios, as indicated (diameters measured with ImageJ; histograms were calculated using OriginPro 9.0). Mean diameter and sample size (N) are shown on the Figure.   | S5   |
| <b>Figure S5.</b> DSC thermograms for Ca-alginate and g-Ca-alginate (G41) aerogels with different LA/OH molar ratios, as indicated.                                                                                                                                               | S6   |
| <b>Figure S6.</b> N <sub>2</sub> -sorption diagrams of Ca-alginate and g-Ca-alginate (G41) aerogels, as indicated. Insets show pore size distributions by the BJH method.                                                                                                         | S8   |
| <b>Figure S7.</b> N <sub>2</sub> -sorption diagrams of Ca-alginate and g-Ca-alginate (G56) aerogels, as indicated. Insets show pore size distributions by the BJH method.                                                                                                         | S9   |
| <b>Figure S8.</b> N <sub>2</sub> -sorption diagrams of M-alginate and g-M-alginate (G41) aerogels, as indicated. Insets show pore size distributions by the BJH method.                                                                                                           | S10  |
| <b>Figure S9.</b> N <sub>2</sub> -sorption diagrams of M-alginate and g-M-alginate (G56) aerogels, as indicated. Insets show pore size distributions by the BJH method.                                                                                                           | S11  |

**Citation:** Raptopoulos, G.; Choinopoulos, I.; Kontoes-Georgoudakis, F.; Paraskevopoulou, P. Poly lactide-Grafted Metal-Alginate Aerogels. *Polymers* **2022**, *14*, 1254. <https://doi.org/10.3390/polym14061254>

Academic Editor: Amir Ameli

Received: 16 February 2022

Accepted: 15 March 2022

Published: 21 March 2022

**Publisher's Note:** MDPI stays neutral with regard to jurisdictional claims in published maps and institutional affiliations.

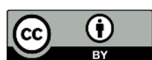

**Copyright:** © 2022 by the authors. Submitted for possible open access publication under the terms and conditions of the Creative Commons Attribution (CC BY) license (<https://creativecommons.org/licenses/by/4.0/>).

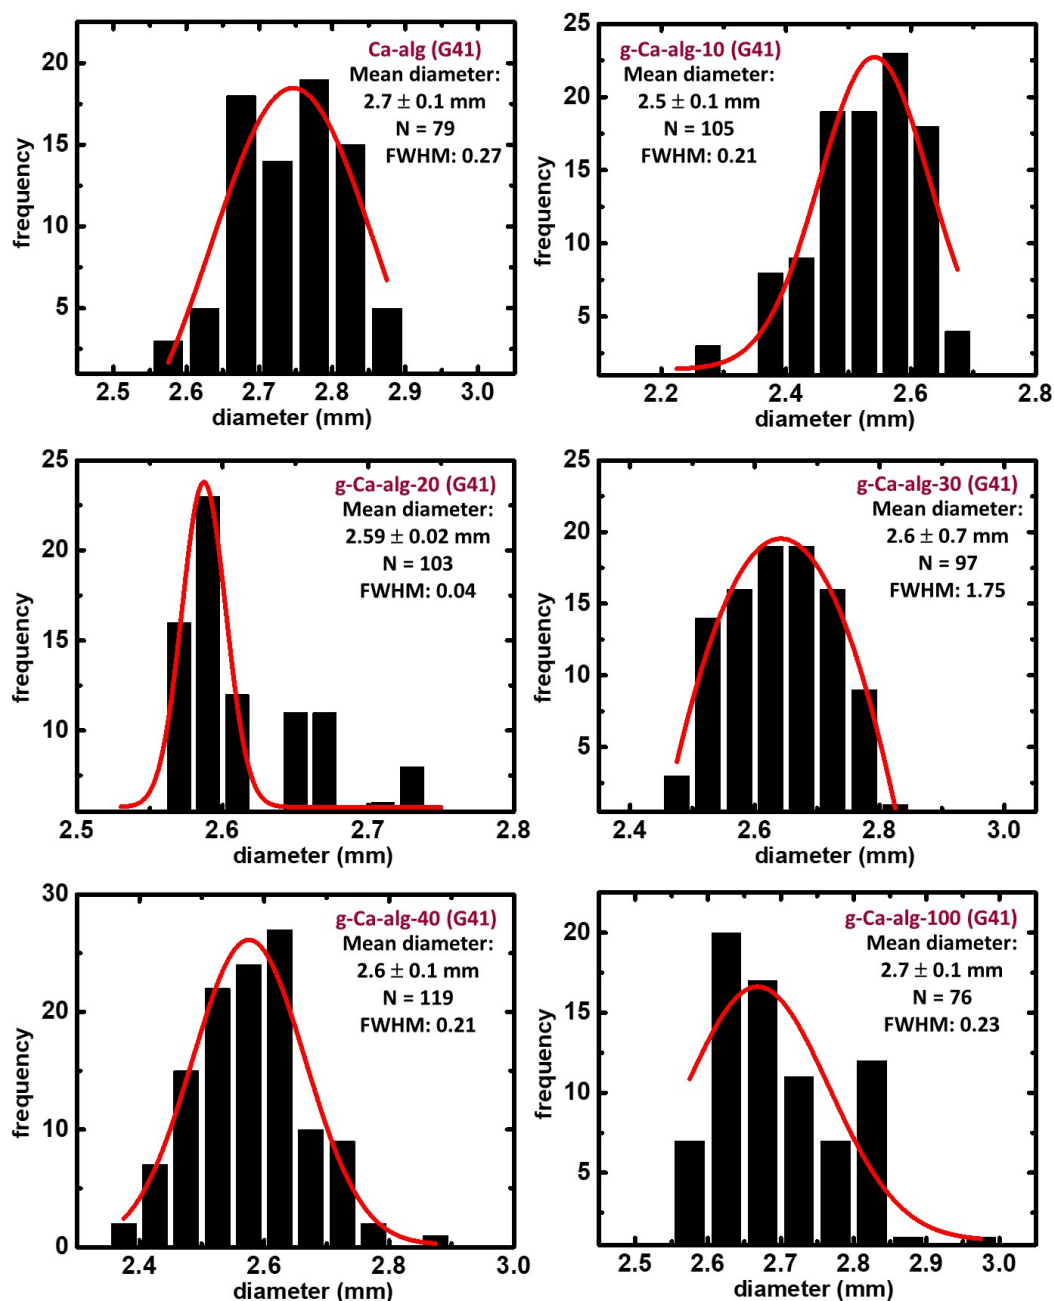

**Figure S1.** Size distributions of Ca-alginate and g-Ca-alginate (G41) aerogels with different LA/-OH molar ratios, as indicated (diameters measured with ImageJ; histograms were calculated using OriginPro 9.0). Mean diameter and sample size (N) are shown on the Figure.

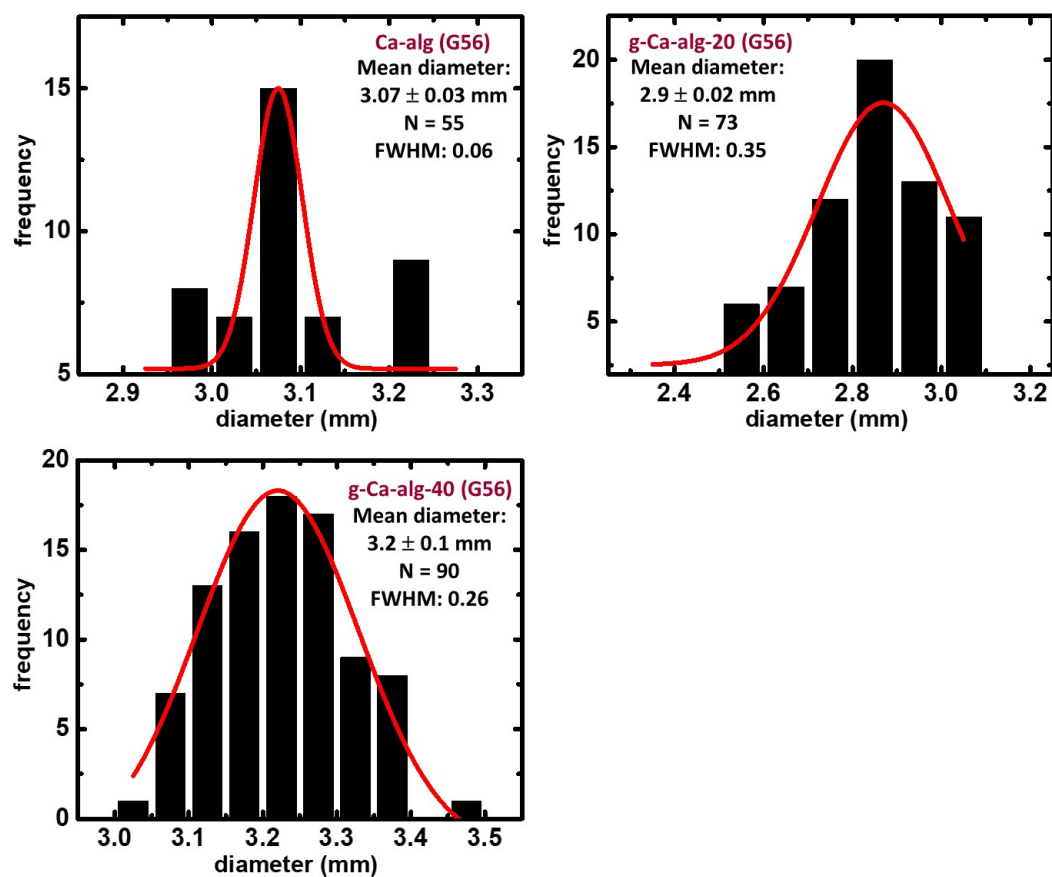

**Figure S2.** Size distributions of Ca-alginate and g-Ca-alginate (G56) aerogels with different LA/-OH molar ratios, as indicated (diameters measured with ImageJ; histograms were calculated using OriginPro 9.0). Mean diameter and sample size (N) are shown on the Figure.

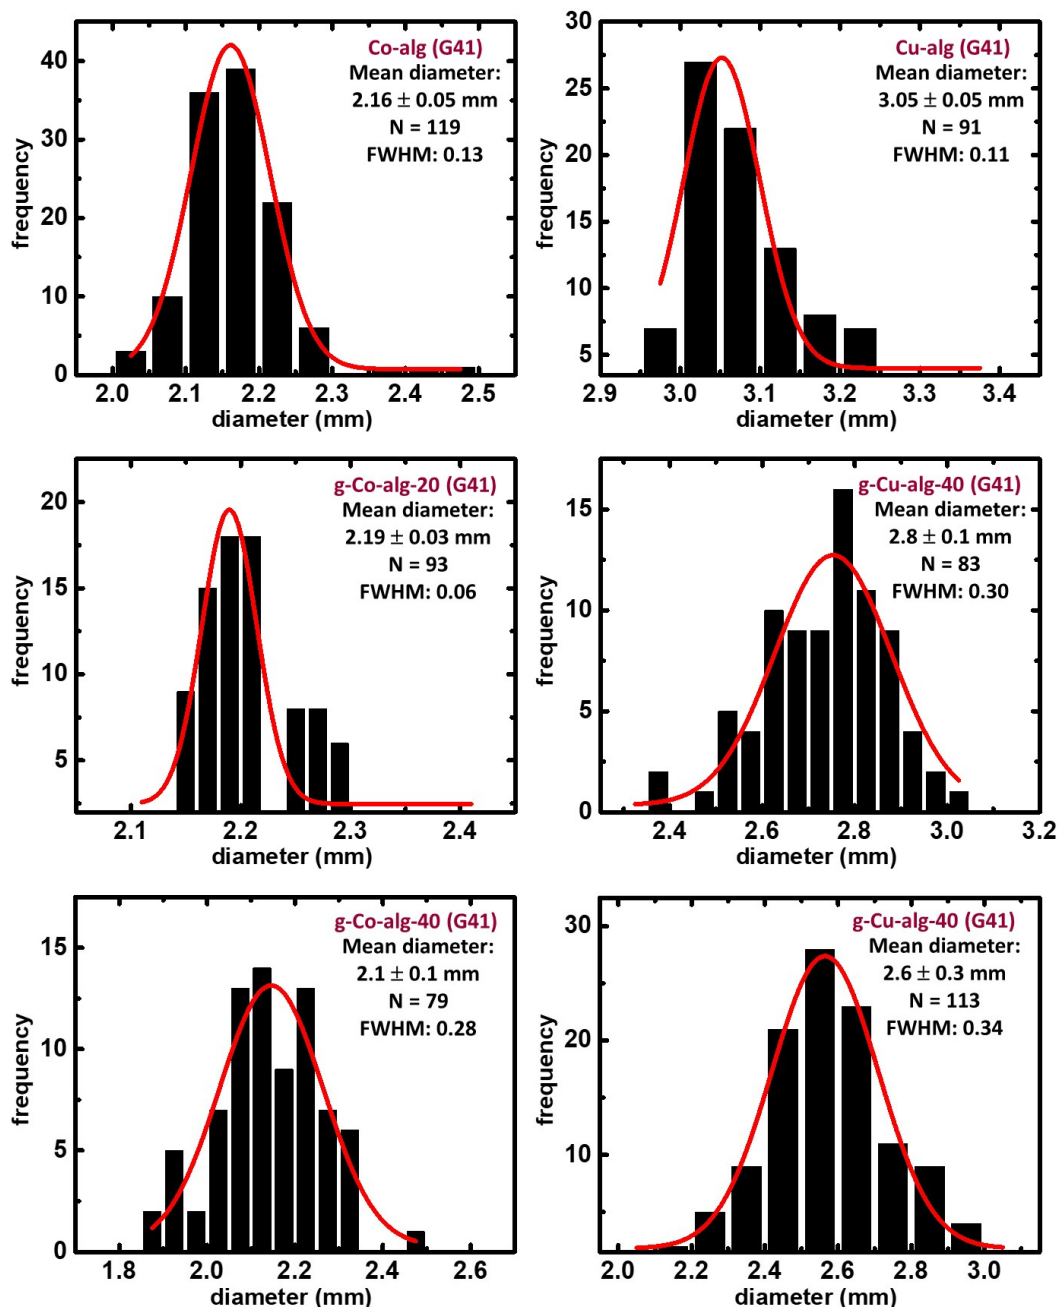

**Figure S3.** Size distributions of M-alginate and g-M-alginate (G41) aerogels with different LA/-OH molar ratios, as indicated (diameters measured with ImageJ; histograms were calculated using OriginPro 9.0). Mean diameter and sample size (N) are shown on the Figure.

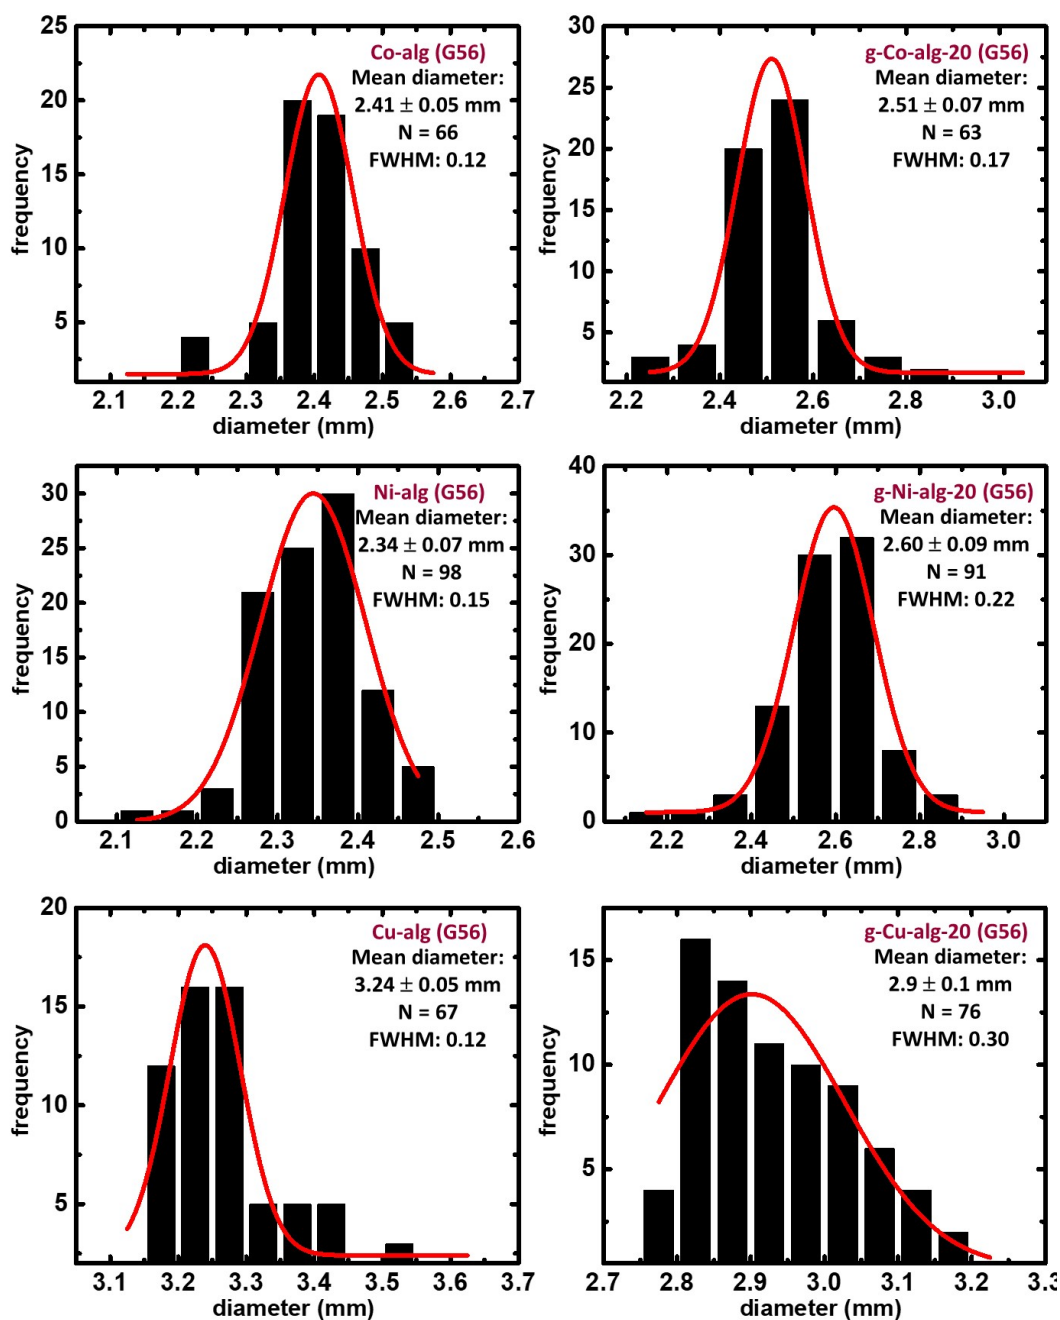

**Figure S4.** Size distributions of M-alginate and g-M-alginate (G56) aerogels with different LA/-OH molar ratios, as indicated (diameters measured with ImageJ; histograms were calculated using OriginPro 9.0). Mean diameter and sample size (N) are shown on the Figure.

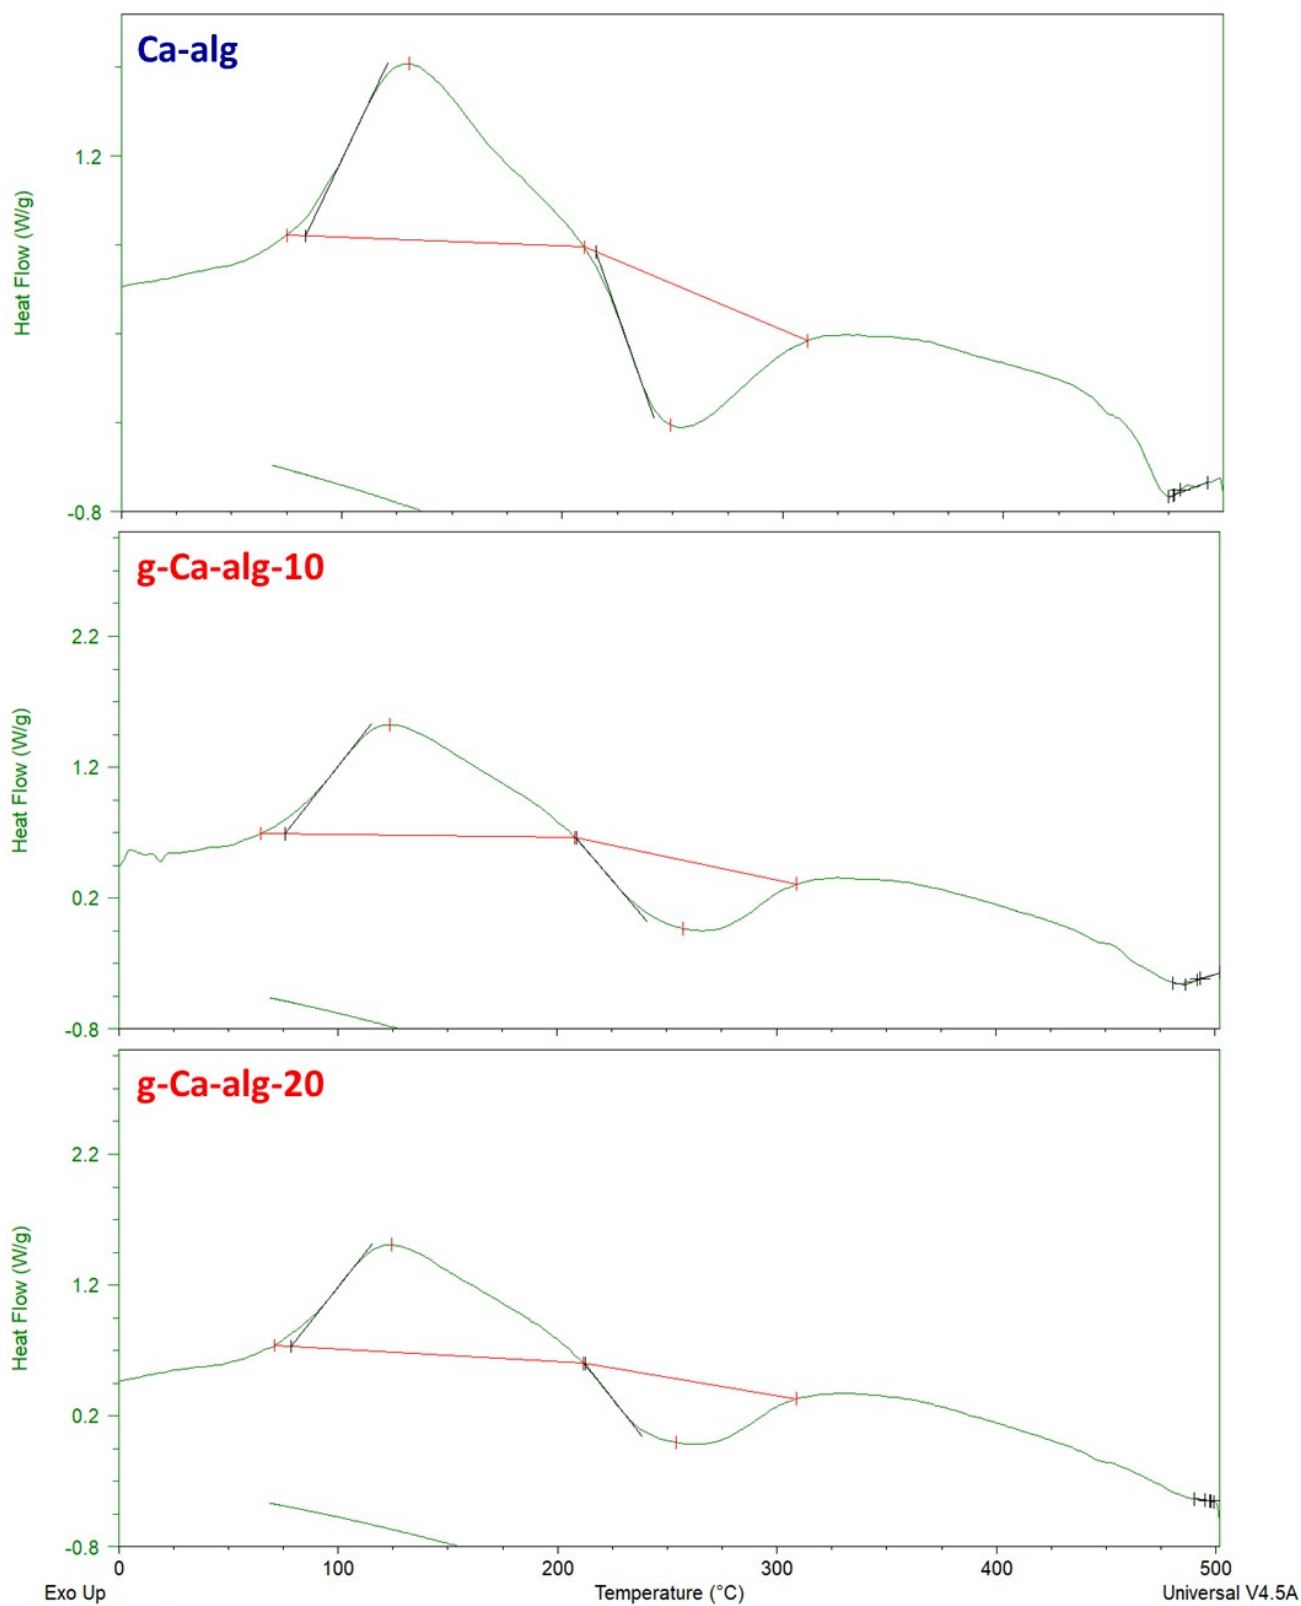

Figure S5. Cont.

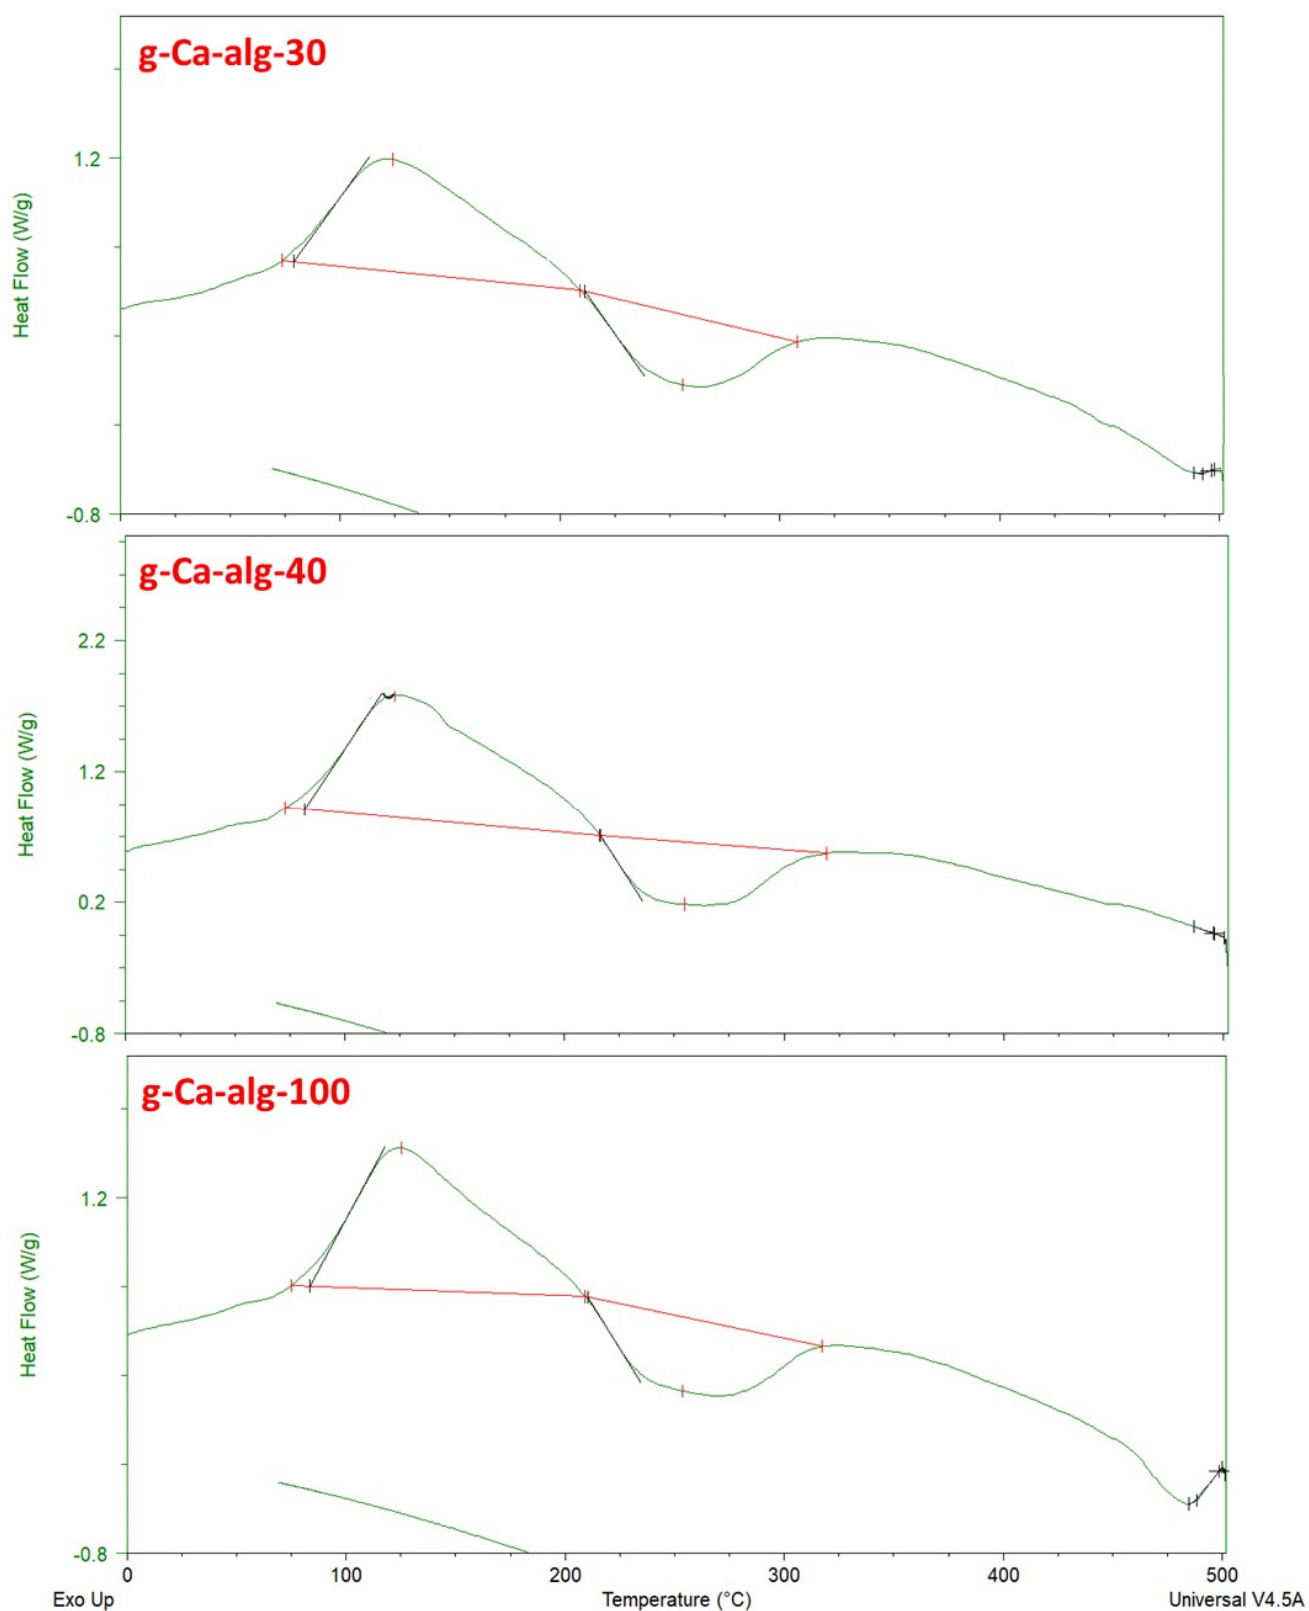

**Figure S5.** DSC thermograms for Ca-alginate and g-Ca-alginate (G41) aerogels with different LA/OH molar ratios, as indicated.



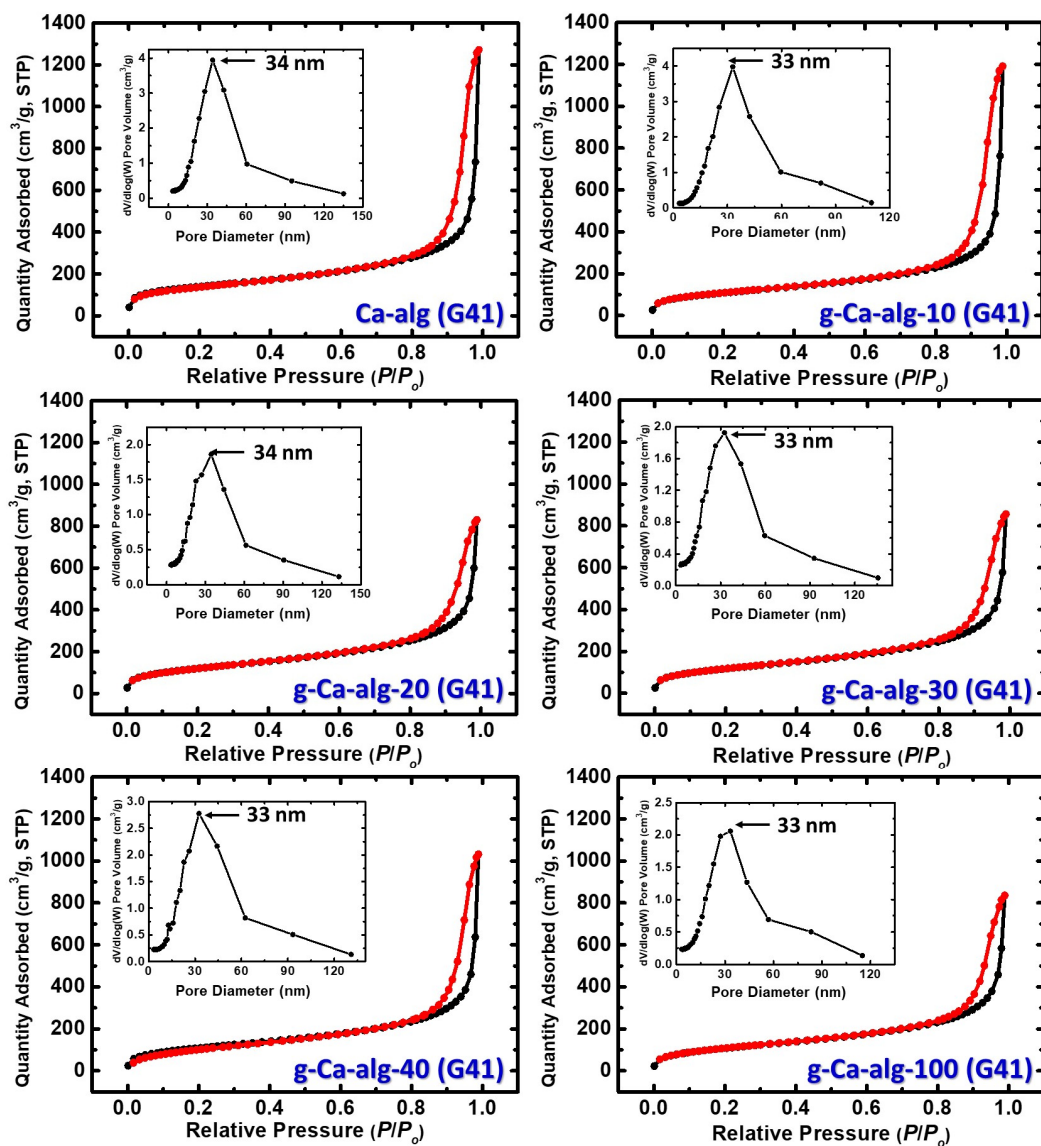

**Figure S6.** N<sub>2</sub>-sorption diagrams of Ca-alginate and g-Ca-alginate (G41) aerogels, as indicated. Insets show pore size distributions by the BJH method.



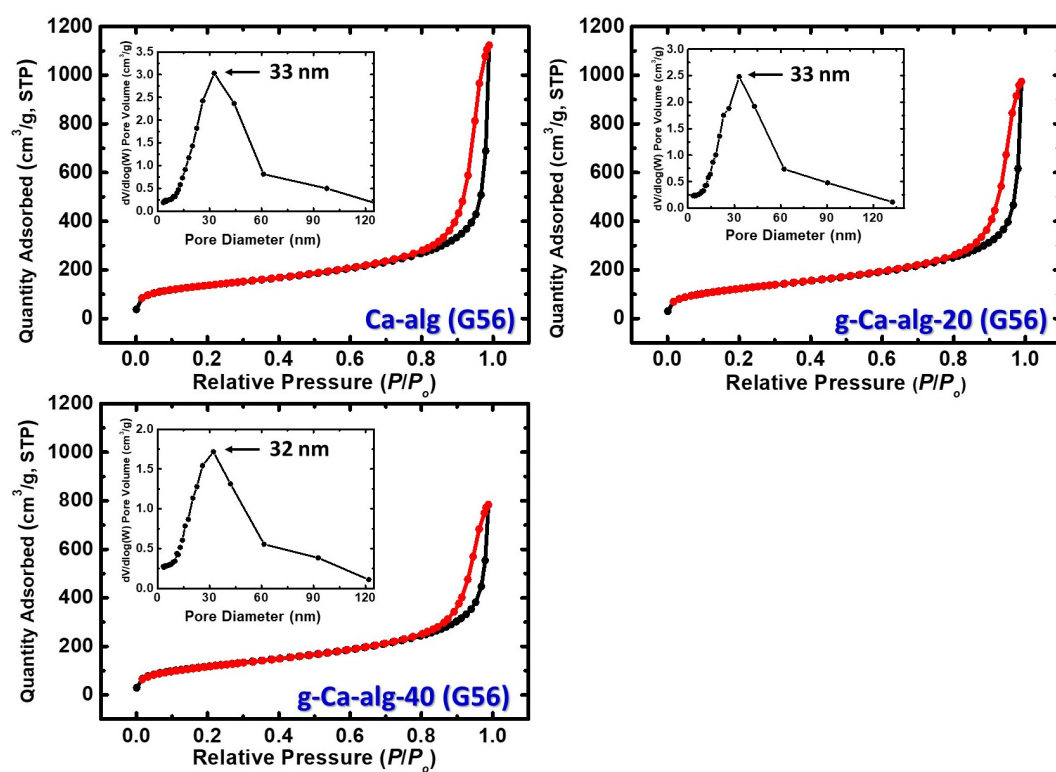

**Figure S7.** N<sub>2</sub>-sorption diagrams of Ca-alginate and g-Ca-alginate (G56) aerogels, as indicated. Insets show pore size distributions by the BJH method.

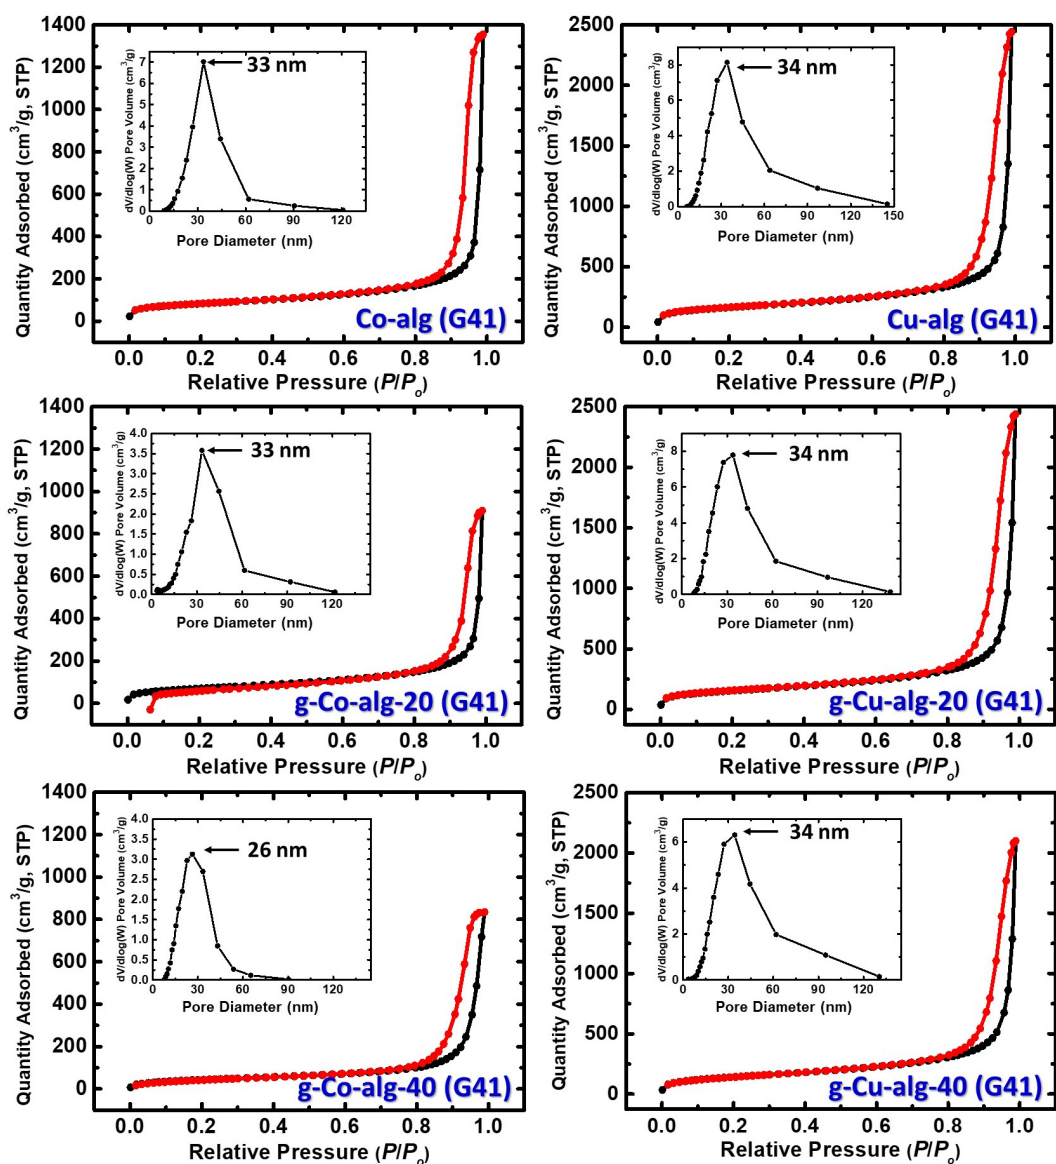

**Figure S8.** N<sub>2</sub>-sorption diagrams of M-alginate and g-M-alginate (G41) aerogels, as indicated. Insets show pore size distributions by the BJH method.

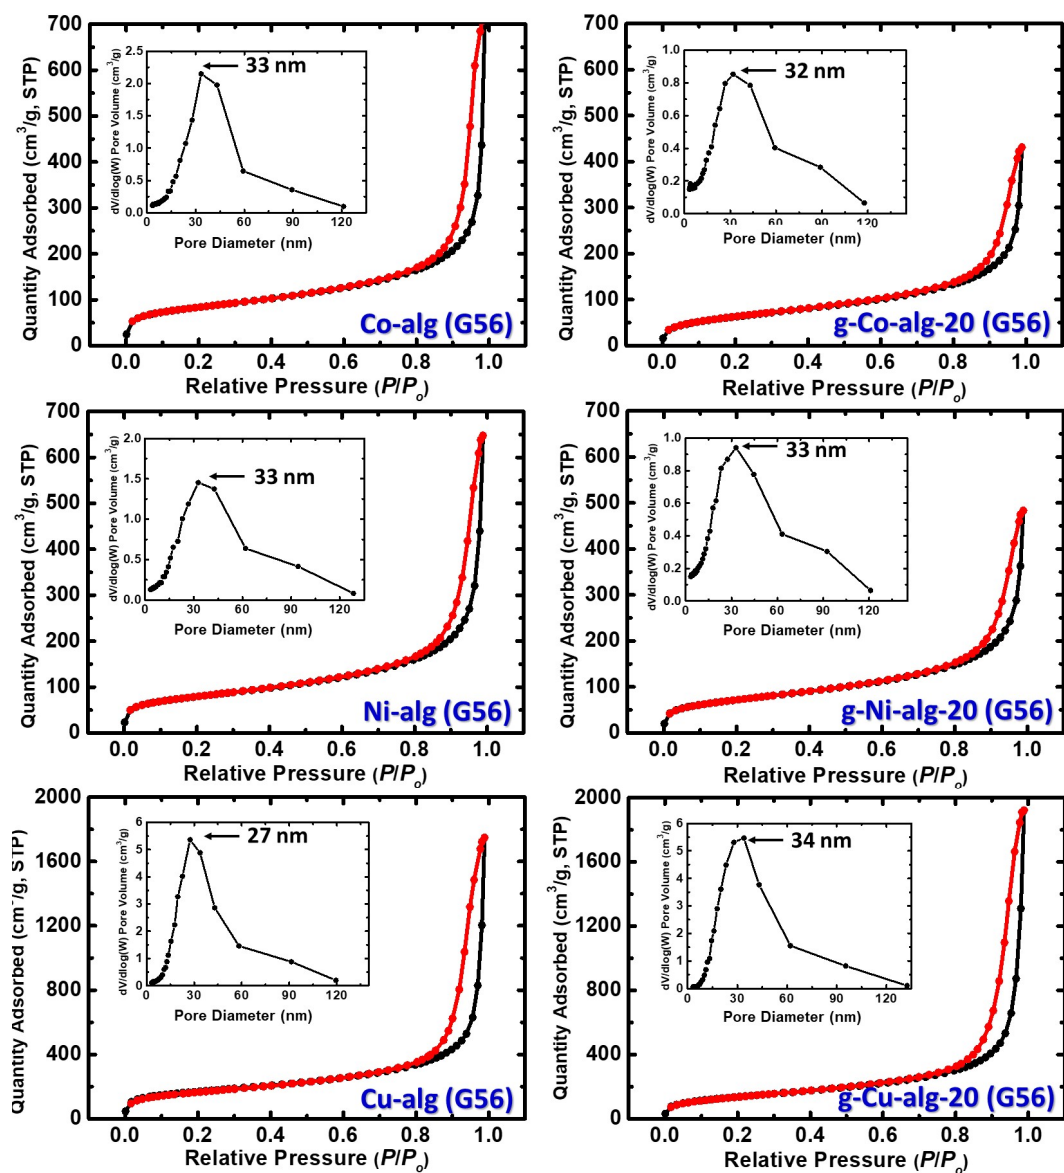

**Figure S9.**  $N_2$ -sorption diagrams of M-alginate and g-M-alginate (G56) aerogels, as indicated. Insets show pore size distributions by the BJH method.
